# Supplementary material
Source: PubMed Central journal article supplement (PMC3522242)

Supplemental Figure 1.

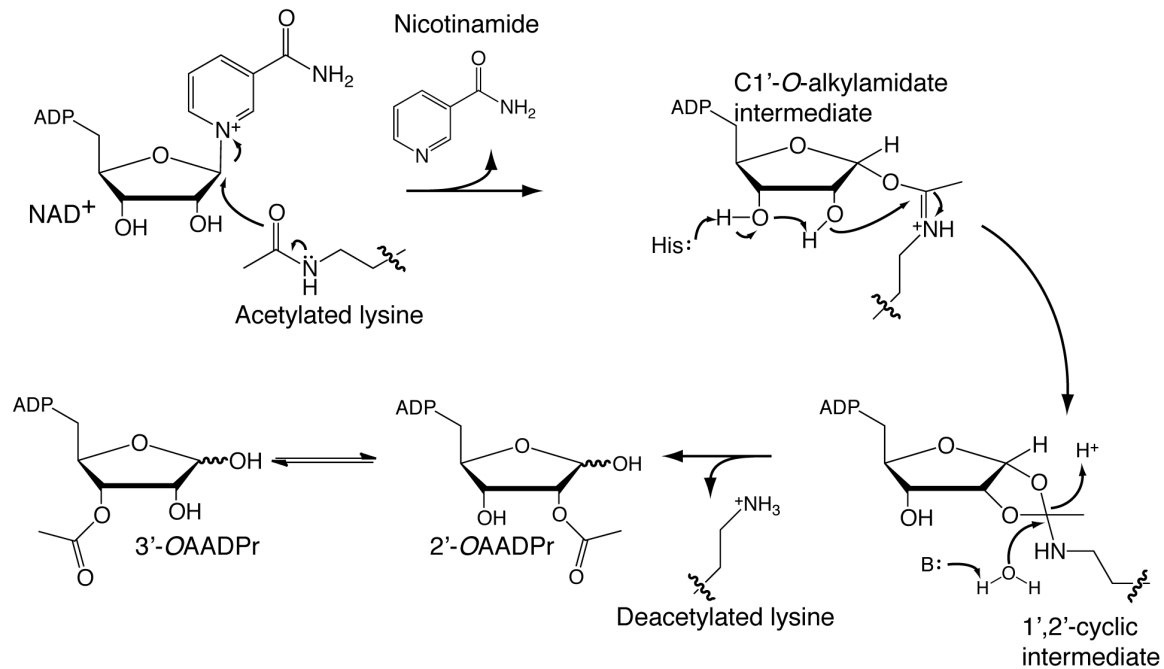

Supplement: supp_R112.378877_jbc.R112.378877-1.pdf [file supp_R112.378877_jbc.R112.378877-1.pdf]
